# Supplementary material
Source: PubMed Central journal article supplement (PMC2680997)
Supplement: mmc1.pdf [file mmc1.pdf]

## Supplemental Data

### Multilocus Bayesian Meta-Analysis

#### of Gene-Disease Associations

Paul J. Newcombe, Claudio Verzilli, Juan P. Casas, Aroon D. Hingorani, Liam Smeeth, and John C. Whittaker

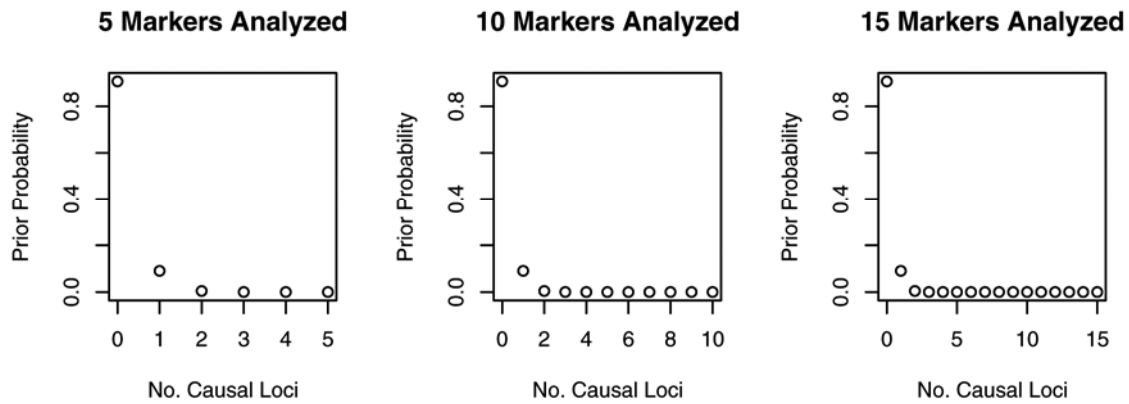

Figure S1. Model space priors used for the Bayesian multi-locus analysis. Poisson(0.05) distributions were used, truncated to the number of markers analyzed. Plots show the prior probabilities for the number of causal loci.

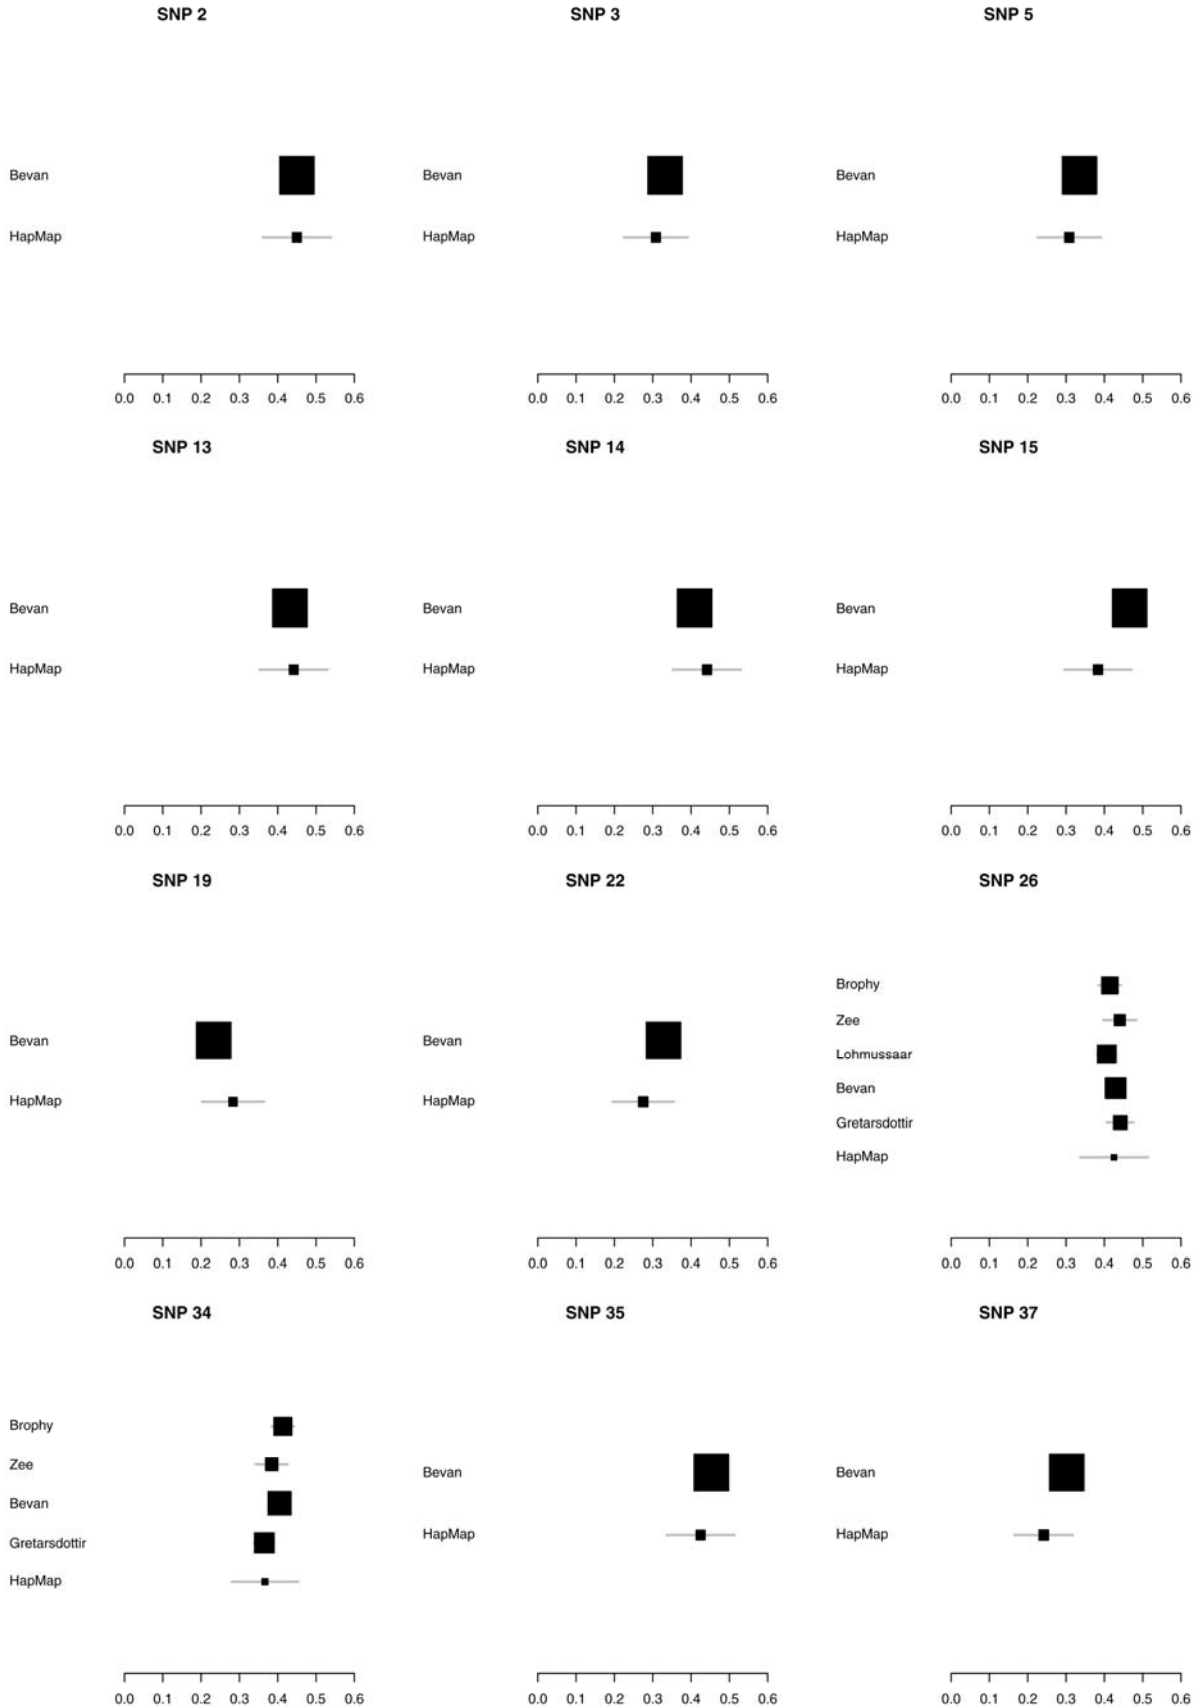

Figure S2. Study reported MAFs For SNPs 2 to 37. 95% CIs were calculated using a binomial normal approximation. SNPs are indicated by their deCODE numbers.

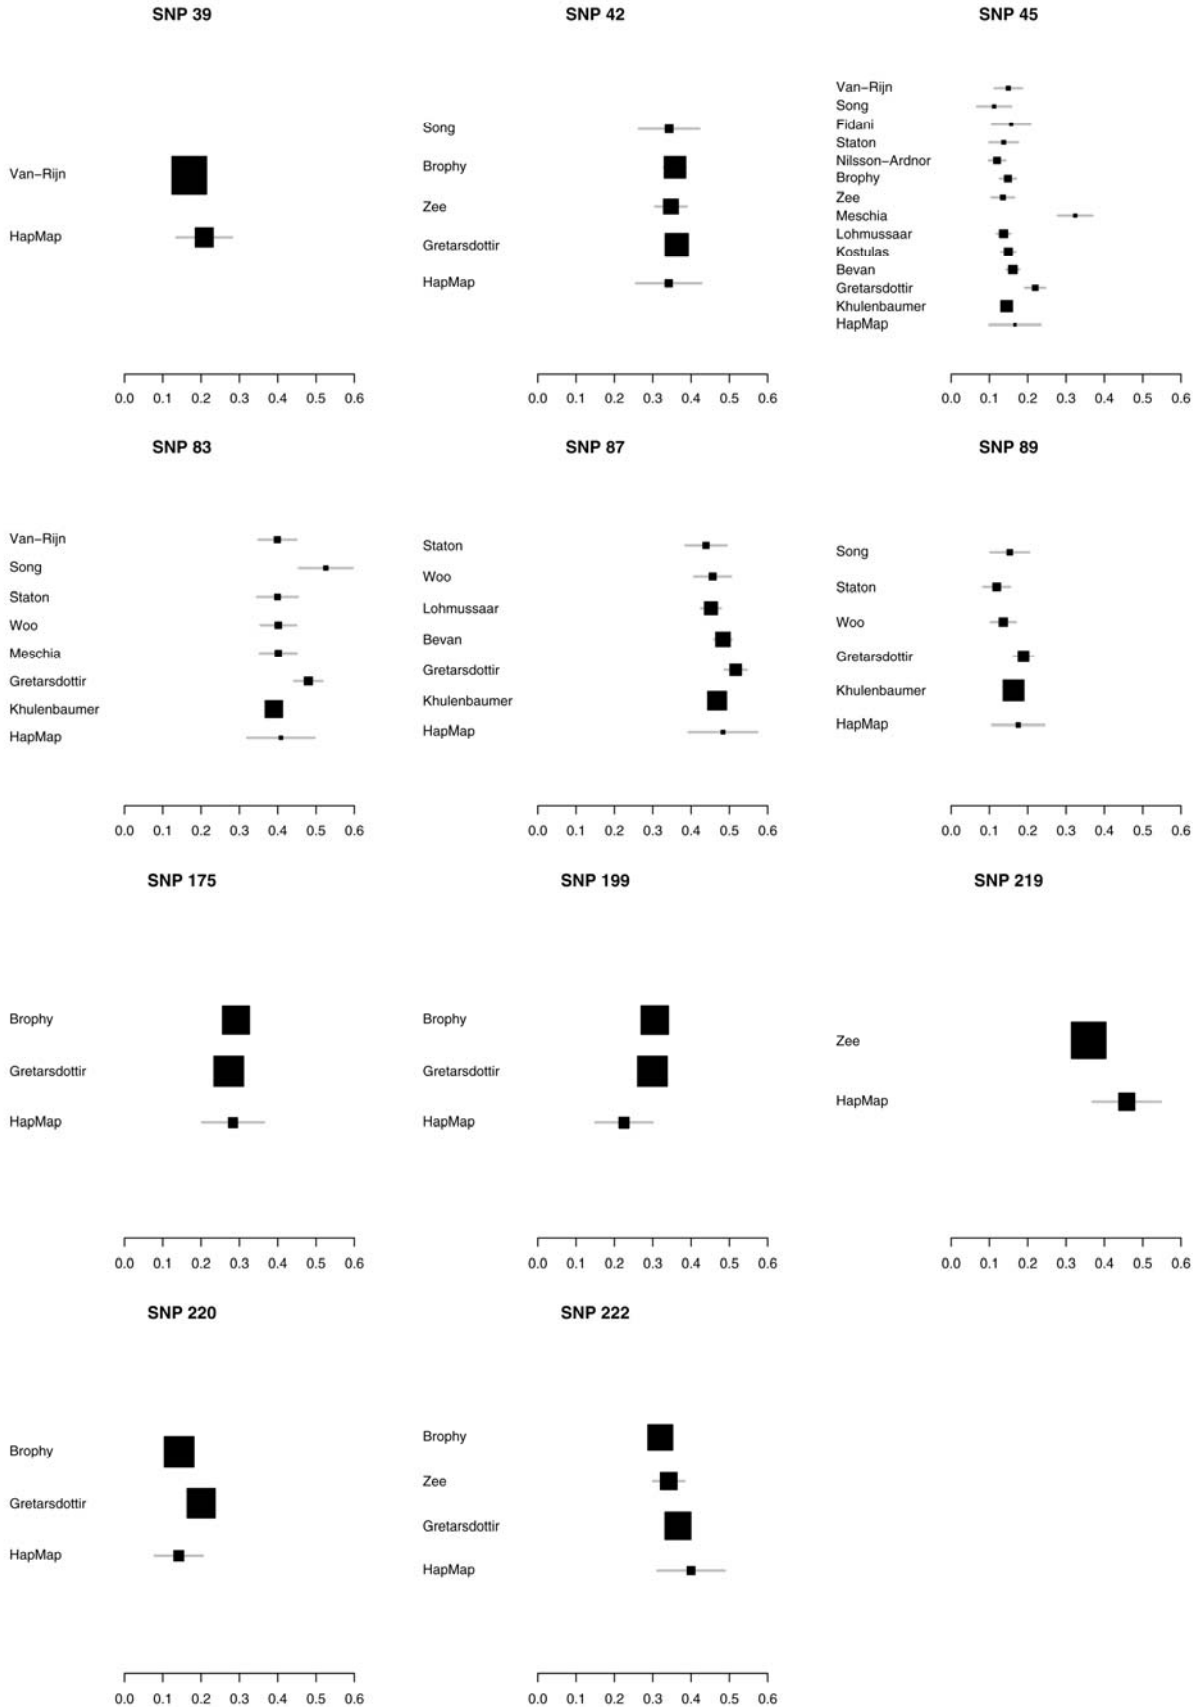

Figure S3. Study reported Minor Allele Frequencies For SNPs 39 to 222. 95% CIs were calculated using a binomial normal approximation. SNPs are indicated by their deCODE numbers.

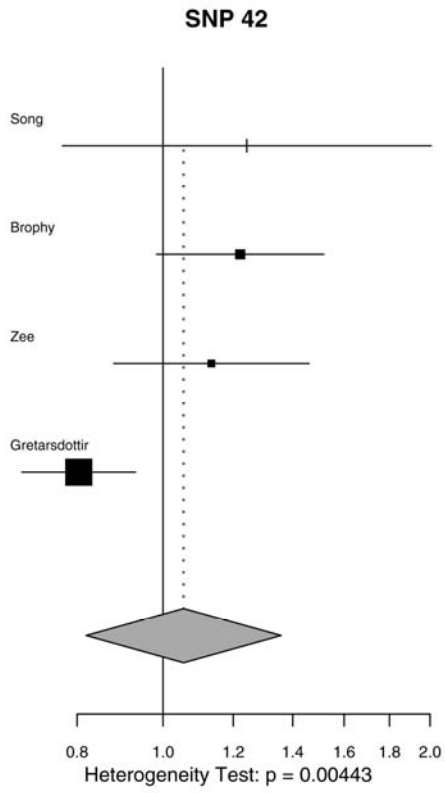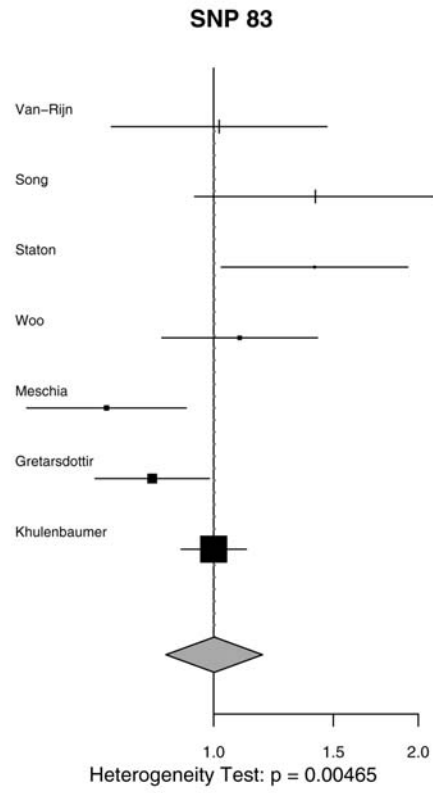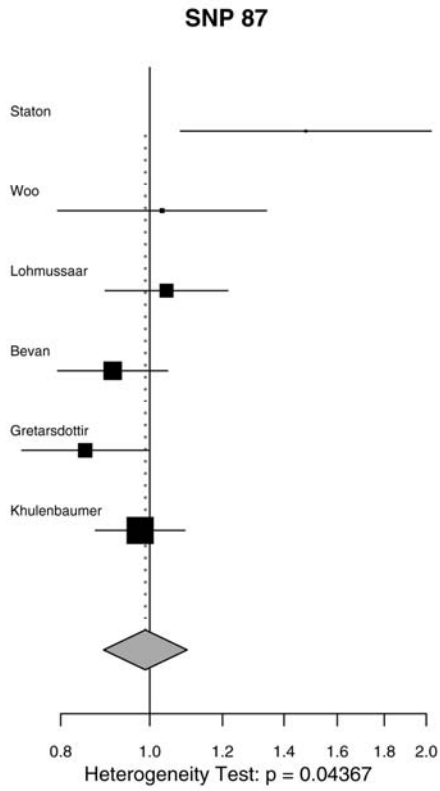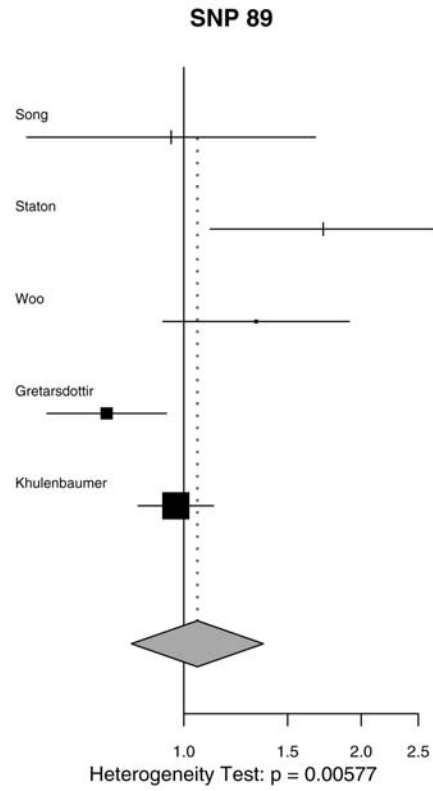

Figure S4. Reported Additive OR Forest Plots For SNPs 42, 83, 87, 89. Significant heterogeneity in reported ORs was found for these SNPs (Dersimonian and Laird p-values are given). The pooled estimates were calculated from univariate random effects Meta-analyses. For each OR, 95% confidence intervals are given.

|                            | SNP 1      | SNP 2      | SNP 3      | SNP 4      | SNP 5      |
|----------------------------|------------|------------|------------|------------|------------|
| Mean Allele F <sub>q</sub> | 0.37       | 0.14       | 0.16       | 0.16       | 0.46       |
| True OR                    | 1          | 1.5        | 1          | 1          | 1          |
| Prop Sig <sup>a</sup>      | 0.05       | 1.00       | 1.00       | 0.90       | 0.05       |
| Mean OR (SE)               | 0.98(0.01) | 1.52(0.02) | 1.29(0.01) | 1.32(0.03) | 0.98(0.01) |
| Mean CI length             | 0.18       | 0.47       | 0.18       | 0.49       | 0.17       |

Table S1. Average Results From Single-SNP Meta-Analyses of Simulated Data Replicates. Results are means (SE) of the OR estimate over 20 analyses of replicate data sets simulated under identical conditions. <sup>a</sup>Proportion of replicates in which SNP is significant at the %5 level.



|                                   | SNP 1        | SNP 2      | SNP 3        | SNP 4        | SNP 5      | $\sigma_{Hap}$          |
|-----------------------------------|--------------|------------|--------------|--------------|------------|-------------------------|
| Mean Allele Fq                    | 0.37         | 0.14       | 0.16         | 0.16         | 0.46       | -                       |
| True OR                           | 1            | 1.5        | 1            | 1            | 1          | -                       |
| Mean Post Prob (SE)               | 0.02(0.07)   | 1(0.01)    | 0.03(0.06)   | 0.03(0.05)   | 0.09(0.25) | 1.00(0)                 |
| Mean OR (SE)                      | 1.00(< 0.01) | 1.49(0.07) | 1.00(< 0.01) | 1.00(< 0.01) | 0.99(0.04) | 0.13(0.03) <sup>a</sup> |
| Mean BCI length                   | 0.01         | 0.35       | 0.05         | 0.06         | 0.02       | 0.12                    |
| Mean OR pres (SE) <sup>b</sup>    | 1.01(0.05)   | 1.49(0.07) | 0.98(0.11)   | 1.02(0.13)   | 1.00(0.06) | 0.13(0.03) <sup>a</sup> |
| Mean BCI length pres <sup>b</sup> | 0.08         | 0.34       | 0.23         | 0.32         | 0.12       | 0.12                    |

Table S2. Average Results From Bayesian Multi-SNP Meta-Analyses of Simulated Data Replicates. Results are means (SE) of estimators over 20 analyses of replicate data sets simulated under identical conditions. In each analysis OR estimates were taken as the median of the posterior sample. <sup>a</sup>These are point estimates of  $\sigma_{Hap}$  and therefore are not ORs. <sup>b</sup>Calculated conditional on SNP being included in a model.

|                                   | SNP 1      | SNP 2        | SNP 3        | SNP 4        | SNP 5        | $\sigma_{Hap}$          |
|-----------------------------------|------------|--------------|--------------|--------------|--------------|-------------------------|
| Mean Allele Fq                    | 0.37       | 0.43         | 0.44         | 0.44         | 0.46         | -                       |
| True OR                           | 1          | 1            | 1            | 1            | 1            | -                       |
| Mean Post Prob (SE)               | 0.03(0.08) | 0.02(0.03)   | 0.02(0.02)   | 0.02(0.02)   | 0.02(0.05)   | 1.00(0)                 |
| Mean OR (SE)                      | 1.00(0.01) | 1.00(< 0.01) | 1.00(< 0.01) | 1.00(< 0.01) | 1.00(< 0.01) | 0.11(0.03) <sup>a</sup> |
| Mean BCI length                   | 0.01       | 0.01         | 0.01         | < 0.01       | 0.01         | 0.11                    |
| Mean OR pres (SE) <sup>b</sup>    | 1.01(0.03) | 1.00(0.04)   | 1.00(0.03)   | 1.00(0.03)   | 1.00(0.03)   | 0.11(0.03) <sup>a</sup> |
| Mean BCI length pres <sup>b</sup> | 0.09       | 0.11         | 0.10         | 0.10         | 0.10         | 0.11                    |

Table S3. Average Results From Bayesian Multi-SNP Meta-Analyses of Simulated Data Replicates. Results are means (SE) of estimators over 200 analyses of replicate data sets simulated under identical conditions. In each analysis OR estimates were taken as the median of the posterior sample. <sup>a</sup>These are point estimates of  $\sigma_{Hap}$  and therefore are not ORs. <sup>b</sup>Calculated conditional on SNP being included in a model.

| Study                      | Cases | Controls | Country     | Year | SNPs  |          |          |
|----------------------------|-------|----------|-------------|------|-------|----------|----------|
|                            |       |          |             |      | Typed | Reported | Analysed |
| Van-Rijn                   | 89    | 192      | Netherlands | 2005 | 3     | 3        | 3        |
| Song                       | 94    | 99       | USA         | 2006 | 23    | 23       | 5        |
| Fidani                     | 97    | 102      | Greece      | 2007 | 1     | 1        | 1        |
| Staton                     | 151   | 164      | Australia   | 2006 | 6     | 6        | 5        |
| Nilsson-Ardnor             | 222   | 447      | Sweden      | 2005 | 3     | 3        | 2        |
| Brophy                     | 248   | 560      | USA         | 2006 | 13    | 13       | 9        |
| Woo                        | 250   | 219      | USA         | 2006 | 5     | 5        | 3        |
| Zee                        | 259   | 259      | USA         | 2006 | 9     | 9        | 7        |
| Meschia                    | 279   | 210      | USA         | 2005 | 5     | 4        | 2        |
| Lohmussaar                 | 639   | 736      | Germany     | 2005 | 12    | 2        | 2        |
| Kostulas                   | 685   | 751      | Sweden      | 2007 | 2     | 2        | 2        |
| Bevan                      | 737   | 928      | UK          | 2005 | 19    | 19       | 14       |
| Gretarsdottir <sup>a</sup> | 988   | 652      | Iceland     | 2003 | 261   | 4        | 14       |
| Kuhlenbaumer <sup>b</sup>  | 1159  | 1564     | Germany     | 2006 | 6     | 0        | 4        |

Table S4. Study Characteristics. <sup>a</sup>Data not included in the original publication were obtained from Brophy and Bevan. <sup>b</sup>Data not included in the original publication were obtained from Bevan.

| Excluded Study    | Exc. Cases | Exc. Controls | Country   | SNPs Analysed | Null Post % | Gene BF <sup>a</sup> |
|-------------------|------------|---------------|-----------|---------------|-------------|----------------------|
| Staton            | 151        | 164           | Australia | 5             | 91.5        | 0.89                 |
| Meschia           | 279        | 210           | USA       | 2             | 82.5        | 2.01                 |
| Gretarsdottir     | 988        | 652           | Iceland   | 2             | 87.9        | 1.31                 |
| All But Biggest 5 | 1689       | 2252          | -         | -             | 86.2        | 1.52                 |

Table S5. Sensitivity Analysis Of Block 2. <sup>a</sup>Bayes Factor against the null model.
